# Supplementary material
Source: PubMed Central journal article supplement (PMC3883722)
Supplement: NIHMS524732-supplement-1.pdf [file NIHMS524732-supplement-1.pdf]

| Supplemental Table 1: Inclusion and Exclusion criteria of randomized controlled trials included |                                                            |                                                                                              |                                                            |                                                        |                                                                    |                                                                                                                    |                                                  |                     |
|-------------------------------------------------------------------------------------------------|------------------------------------------------------------|----------------------------------------------------------------------------------------------|------------------------------------------------------------|--------------------------------------------------------|--------------------------------------------------------------------|--------------------------------------------------------------------------------------------------------------------|--------------------------------------------------|---------------------|
| First Author, Year                                                                              | Inclusion criteria                                         |                                                                                              |                                                            | Exclusion criteria                                     |                                                                    |                                                                                                                    | Pre-specified criteria for the stoppage of trial | Loss to follow-up   |
|                                                                                                 | Age (in years)                                             | Stroke severity                                                                              | Treatment window, hours                                    | Clinical features                                      | CT scan showing >33% MCA territory infarct/ischemia                | Vascular imaging showing absence of large vessel occlusion                                                         |                                                  |                     |
| Ciccone, 2013                                                                                   | 18-80                                                      | NIHSS≤25                                                                                     | IV=4.5; IA=6                                               | NIHSS >25, Coma                                        | Acute infarction-no description provided                           | No                                                                                                                 | Yes                                              | Nil                 |
| Broderick, 2013                                                                                 | Initially 18-80, after amendment 3 (in January 2009) 18-82 | NIHSS ≥10;after enrolling 284 patients, NIHSS ≥8                                             | IV=3; IA=start procedure within 5 hours and end in 7 hours | NIHSS <8                                               | Yes, ASPECTS score < 4, Significant mass lesion with midline shift | Initially no, but after protocol amendment (in January 2009) included patients showing LVO of M1, ICA or BA on CTA | Yes <sup>a</sup>                                 | Overall 4.1% of mRS |
| Kidwell, 2013                                                                                   | 18-85                                                      | NIHSS 6-29; large anterior vessel occlusion, IV t-PA failure (LVO identified after IV t-PA). | 8                                                          | Coma; Patient eligible for IV tPA in the first 3 hours | No                                                                 | Yes                                                                                                                | Yes                                              | Overall 7% missing  |
| Ciccone, 2010                                                                                   | 18-80                                                      | NA                                                                                           | IV=3; IA=6                                                 | NIHSS >25, Coma                                        | Acute infarction-no description provided.                          | No                                                                                                                 | Yes <sup>a</sup>                                 | Nil                 |
| Sen, 2009                                                                                       | >18                                                        | ≥4 except for isolated aphasia or hemianopia                                                 | 3                                                          | Lacunar stroke syndrome                                | Yes, Significant mass lesion with midline shift                    | NA                                                                                                                 | NA                                               | Nil                 |

Abbreviations: CTA= computed tomography angiography, IA= intra-arterial, IV= intravenous, LVO= large vessel occlusion, MCA= middle cerebral artery, M1= first segment of MCA (horizontal), M2= second segment of MCA (insular), NA= not available, NIHSS= NIH Stroke Scale, and tPA= tissue plasminogen activator.

<sup>a</sup>trial was stopped before completion.
