# Supplementary material
Source: PubMed Central journal article supplement (PMC3883722)
Supplement: NIHMS524732-supplement-4.pdf [file NIHMS524732-supplement-4.pdf]

## Supplemental Figure

|                                                           | Sen 2009 | Kidwell 2013 Penumbra | Kidwell 2013 Non-penumbra | Ciccone 2013 | Ciccone 2010 | Broderrick 2013 |  |
|-----------------------------------------------------------|----------|-----------------------|---------------------------|--------------|--------------|-----------------|--|
| Random sequence generation (selection bias)               | +        | +                     | +                         | +            | ?            | +               |  |
| Allocation concealment (selection bias)                   | ?        | +                     | +                         | +            | +            | +               |  |
| Blinding of participants and personnel (performance bias) | -        | -                     | -                         | -            | -            | -               |  |
| Blinding of outcome assessment (detection bias)           | ?        | +                     | +                         | +            | +            | +               |  |
| Incomplete outcome data (attrition bias)                  | +        | -                     | -                         | +            | +            | -               |  |
| Selective reporting (reporting bias)                      | -        | +                     | +                         | +            | +            | +               |  |
| Other bias                                                | ?        | +                     | +                         | ?            | ?            | -               |  |
